# Supplementary material
Source: Springer Nature journal article supplement (https://www.springermedizin.de/resource/supplementary/12881_2009_594_MOESM4_ESM.pdf/9451020)

**A. *EVC2*-c. c.2047-1G>T**

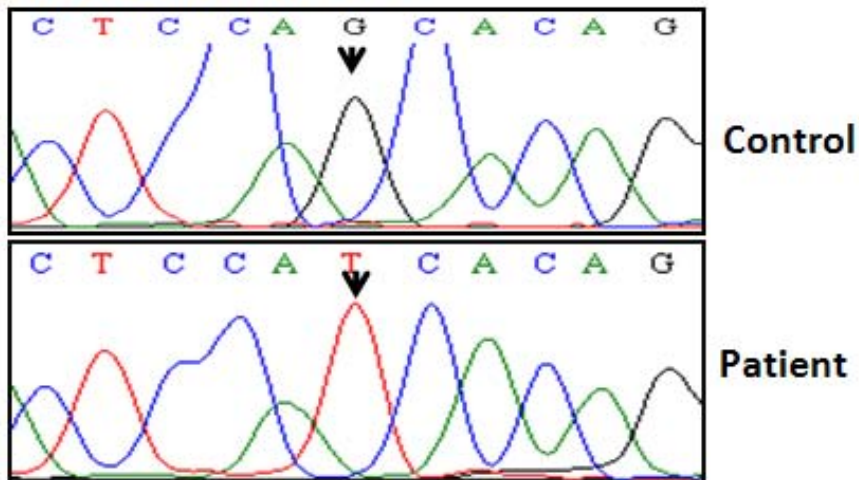

**B. *EVC2*-c.1813C>T (p.Q605X)**

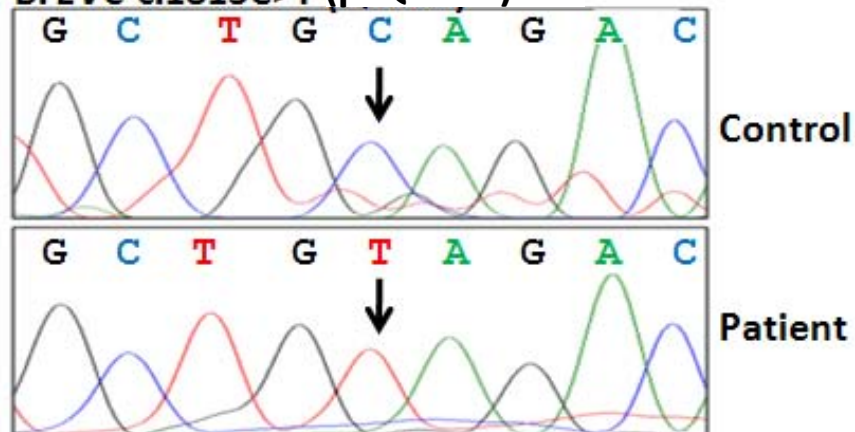

**C. *EVC2*-c.981delG (p.K327fs)**

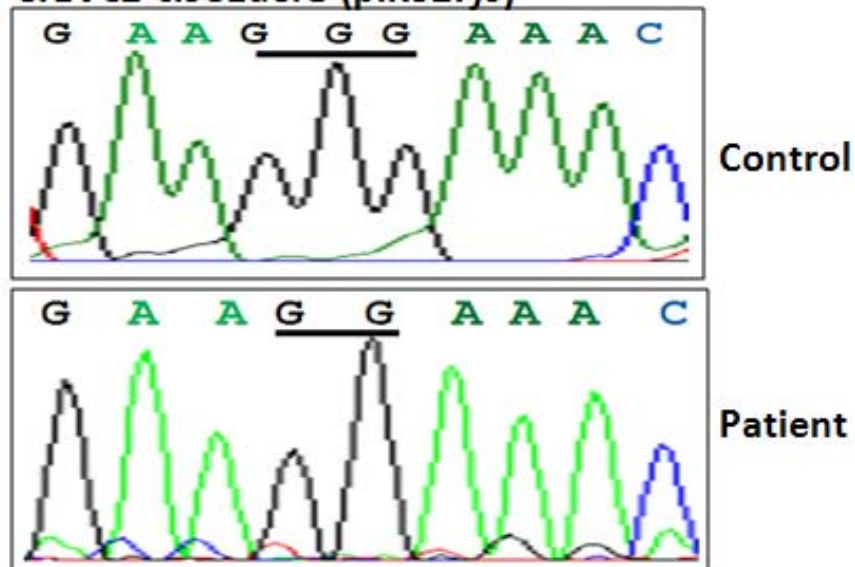

Supplement: MOESM4 [file 9451020]
